# Supplementary material for: An electrochemically grown three-dimensional porous Si@Ni inverse opal structure for high-performance Li ion battery anodes
Source: Royal Society of Chemistry journal article supplement (doi:10.1039/c4ta00147h), 2014-01-01
Supplement: c4ta00147h1.pdf [file c4ta00147h1.pdf]

[Electronic Supplementary Information]

**Electrochemically grown three-dimensional porous Si@Ni inverse  
opal structure for higher-performance Li ion battery anode**

Do Youb Kim,<sup>a</sup> Jungdon Suk,<sup>a</sup> Dong Wook Kim,<sup>a</sup> Yongku Kang,<sup>\*,a</sup> Sang Hyuk Im,<sup>b</sup> Youngj  
o Yang,<sup>c</sup> O Ok Park<sup>c</sup>

<sup>a</sup>Advanced Materials Division, Korea Research Institute of Chemical Research, 141 Gajeong-  
ro, Yuseong-gu, Daejeon 305-600, Republic of Korea.

<sup>b</sup>Department of Chemical Engineering, College of Engineering, Kyung Hee University, Yong  
in-si, Kyunggi-do 446-701, Republic of Korea.

<sup>c</sup>Department of Chemical and Biomolecular Engineering, KAIST, 291 Daehak-ro, Yuseong-g  
u, Daejeon 305-701, Republic of Korea.

\*E-mail: [ykang@kriict.re.kr](mailto:ykang@kriict.re.kr)

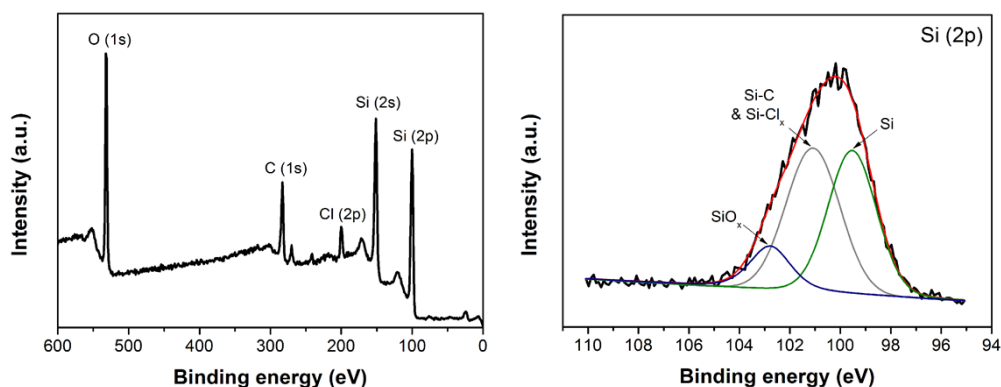

**Fig. S1** Typical low resolution XPS spectrum recorded of as-prepared 3D porous Si@Ni inverse opal structure between 0 and 600 eV (left), and high resolution Si 2p spectrum of the sample (right), respectively.<sup>S1-S3</sup>

## References

- S1 N. Layadi, V. M. Donnelly, J. T. C. Lee, *Appl. Phys. Lett.*, 1997, **81**, 6738.
- S2 S. Yochelis, E. Katzir, Y. Kalcheim, V. Gutkin, O. Millo, Y. Paltiel, *J. Nanotech.*, 2012, 903761
- S3 H. Wang, H. Zhou, A. Gestos, J. Fang, H. Niu, J. Ding, T. Lin, *Soft Mater.*, 2013, **9**, 277.
